1 **Title:** Investigating group-based classes ('weaning workshops') to support complementary infant  
2 feeding in Irish primary care settings: A cross-sectional survey.

3  
4 **Authors:**

5 Caragh Flannery<sup>1,2\*</sup>, Caroline Shea<sup>1</sup>, Yvonne O'Brien<sup>3</sup>, Joanne O'Halloran<sup>4</sup>, Karen Matvienko-Sikar<sup>1</sup>,  
6 Colette Kelly<sup>5</sup>, Elaine Toomey<sup>6,7\*</sup>

7  
8 \*joint first authors

9  
10 **Affiliations:**

- 11 1. School of Public Health, University College Cork, Cork, Ireland  
12 2. INFANT Centre, Cork University Maternity Hospital, University College Cork, Ireland.  
13 3. Community Nutrition and Dietetic Service, Cork Kerry Community Healthcare, Health Service  
14 Executive, Ireland  
15 4. Primary Care Centre, Mountkennedy Town Centre, Newtownmountkennedy, Co Wicklow, Ireland  
16 5. Health Promotion Research Centre, National University of Ireland Galway, Galway, Ireland  
17 6. School of Allied Health, University of Limerick, Co. Limerick, Ireland  
18 7. Health Research Institute, University of Limerick, Co. Limerick, Ireland

19  
20 **Shortened title:** Exploring weaning workshops in Irish primary care

21  
22 **Corresponding author:** Dr Elaine Toomey, School of Allied Health, University of Limerick, Limerick,  
23 Ireland. [Elaine.c.toomey@ul.ie](mailto:Elaine.c.toomey@ul.ie); 00353-61234232

24  
25 **Acknowledgements:** The authors would like to sincerely thank the participants who took the time to  
26 complete this survey. This research received no specific grant from any funding agency, commercial  
27 or not-for-profit sectors and was conducted as part of a MA in Public Health in University College Cork  
28 undertaken by Caroline Shea and supervised by Dr Elaine Toomey and Dr Caragh Flannery.

29  
30 **Conflict of Interest:** None.

31  
32 **Ethical Standards Disclosure:** This study was conducted according to the guidelines laid down in the  
33 Declaration of Helsinki and all procedures involving research study participants were approved by the

34 School of Public Health Internal Social Research Ethics Committee in University College Cork. Written  
35 informed consent was obtained from all participants.

36

37 **Authorship:** ET and YOB conceived the study. CS developed the study and conducted data collection  
38 under supervision from ET and CF. All authors provided substantial contributions to the design,  
39 acquisition, analysis, and interpretation of data. All authors were involved in drafting and approving  
40 the manuscript.

41

42 **Abstract:**

43 **Objective:** This study aims to 1) investigate current practice regarding ‘weaning workshops’ to support  
44 complementary infant feeding delivered within Irish primary care, 2) explore the experiences and  
45 opinions of community dietitians regarding optimal content and modes of delivery of weaning  
46 workshops, and 3) identify the key factors to be considered in the development and implementation  
47 of weaning workshops delivered within primary care.

48 **Design:** Cross-sectional survey

49 **Setting:** Irish primary care

50 **Participants:** 47 community-based dietitians

51 **Results:** Sixteen dietitians reported that workshops were run in their area with variable frequency,  
52 with ten reporting that workshops were never run in their area. Participants reported that mostly  
53 mothers of medium socioeconomic status attended weaning workshops when infants were aged  
54 between 4-7 months, and that feedback from workshop attendees was predominantly positive.  
55 Dietitians identified that key factors to be considered in future development and delivery of weaning  
56 workshops are 1) workshop characteristics such as content, timing and venue, 2) organisational  
57 characteristics such as availability of resources and multidisciplinary involvement, and 3) attendee  
58 characteristics such as socioeconomic status.

59 **Conclusions:** This study highlights substantial variability regarding provision of weaning workshops in  
60 Ireland, and a lack of standardisation regarding the provider, content, and frequency of workshops  
61 where workshops are being delivered. The study also provides unique insights into the experiences  
62 and opinions of primary care community dietitians regarding the development and delivery of  
63 weaning workshops in terms of optimal content and delivery options. These perspectives will make a  
64 valuable contribution given the dearth of evidence in this area internationally.

65

66

67

68 **Background:**

69 Optimum infant nutrition is a vital aspect of healthy child development and chronic disease  
70 prevention, and the complementary introduction of solid foods within the first two years of life plays  
71 a key role in this. International World Health Organisation (WHO) infant feeding guidelines  
72 recommend that infants be exclusively breastfed until 6 months, with nutritionally adequate and  
73 appropriate solid foods introduced from 6 months onwards (1, 2). However, despite these  
74 recommendations, a substantial proportion of infants globally are introduced to solids before four  
75 months (3, 4). In Ireland, a recent study identified that 18% of Irish infants had begun complementary  
76 feeding before 17 weeks, with another showing 13.5% taking solids between 12 and 16 weeks (5-7).  
77 Previous research also found that a high proportion of Irish infants aged six months consume foods  
78 high in energy, salt, saturated fats, and refined sugars (8, 9). Given the importance of establishing  
79 healthy dietary behaviours from childhood, supporting parents and primary caregivers to introduce  
80 solid foods for infants and young children in line with best practice recommendations is of key  
81 significance both nationally and internationally.

82

83 Multiple factors influence complementary infant feeding behaviours. For example, Fall et al (2011)  
84 identified several factors associated with the early introduction of solids, including younger maternal  
85 age, lower socioeconomic status (SES), lower maternal education, absent/short duration of  
86 breastfeeding and maternal smoking (10). More recently, Gutierrez-Camacho et al. (2019) identified  
87 that higher maternal education, higher age and higher household income are positively associated  
88 with healthy infant feeding behaviours (11). In addition, recent qualitative evidence syntheses  
89 explored parents' perceptions and experiences of infant feeding and identified many factors  
90 influencing parents' complementary feeding behaviours (12, 13). Both reviews found that  
91 complementary feeding behaviours are influenced by multiple sources of advice, in particular those  
92 of peers (i.e., family and friends) and healthcare professionals. The studies identified a need for  
93 greater education and support for parents regarding complementary feeding, particularly within  
94 primary care settings (13), and considering practical issues such as time and cost (12). The reviews also  
95 highlighted greater barriers within lower SES populations, such as the lack of affordability of healthy  
96 food (13), greater misconceptions and lack of knowledge (12).

97

98 Despite an increasing focus on the importance of appropriate complementary infant feeding, and the  
99 need to support parents and primary caregivers to engage in recommended behaviours, the existing  
100 evidence regarding the effectiveness of interventions to improve complementary feeding behaviours  
101 is inconsistent (12, 14, 15). Recent systematic reviews of infant feeding interventions have shown

102 minimal effects on infant feeding practices and other important outcomes such as child weight (12,  
103 14, 15). Methodological limitations of existing interventions have also been highlighted with poor  
104 application and/or use of behaviour change theory, a lack of systematic intervention development  
105 and a lack of focus on long-term implementation and sustainability (15-17). Results of these reviews  
106 have emphasised the importance of trustworthy, non-biased, consistent infant feeding information  
107 for parents while also facilitating the development of practical skills and providing hands-on support  
108 such as demonstrating how to prepare nutritional meals (12, 14-17). Given the important role that  
109 healthcare professionals can play in influencing infant feeding behaviours coupled with the strong  
110 social influence of family and friends (3, 12, 13), the current evidence therefore suggests a need for  
111 rigorously developed and evaluated sustainable community-based interventions that can be  
112 embedded into routine healthcare services. Primary care represents a promising setting for such  
113 interventions given its community-based context and an increasing global focus on health promotion  
114 and disease prevention within primary care practice (18-20). Given their expertise, community  
115 dietitians may have an important role to play in interventions that aim to improve healthy infant  
116 feeding; however, recent research has highlighted limited capacity amongst dietitians to prioritise  
117 preventive-focused interventions over complex clinical issues such as feeding challenges or problems  
118 (21).

119  
120 Group-based parenting programmes have been previously recognised as an effective means to change  
121 parents' behaviour, and when implemented in community-based settings, have been found to  
122 improve child social, emotional outcomes, as well as parenting skills (22-24). Furthermore, these  
123 group-based programmes have shown that they can be delivered with high levels of implementation  
124 fidelity and parental engagement (22, 25, 26). Other studies have identified factors which are  
125 associated with the success of parenting programmes including parental attitudes towards  
126 programme content, changes in parenting skills and confidence, and positive experiences of the group  
127 process (26-28). In the context of early child nutrition, group-based programmes focusing on  
128 complementary feeding, or 'weaning workshops', have been suggested as a promising approach to  
129 target infant feeding practices (12, 21, 23, 24, 29, 30). Such programmes are workshop-style events  
130 that can target several important aspects for effective community-based interventions, e.g. provide  
131 much needed access to evidence-based information, social support, and practical skills. However,  
132 apart from some notable exceptions (29, 30) there is limited research on the development,  
133 implementation and evaluation of weaning workshops within community or primary care settings,  
134 with the majority of evidence focusing predominantly on breastfeeding support or individually-  
135 delivered interventions (31, 32). Additionally, current practice surrounding weaning workshops and

136 service offerings within routine care, and the optimum content and mode(s) of delivery have been  
137 poorly explored to date, both in Ireland and internationally. A previous unpublished report from the  
138 Irish Health Service Executive (HSE) in 2016 completed by 11 dietitians from 9 Irish community health  
139 organisation (CHO) areas identified that weaning workshops were being offered in 7/9 CHO areas, and  
140 that programme content and implementation was highly variable across settings (33). Ten of the  
141 included dietitians highlighted the need for standardised weaning workshop; however this report did  
142 not collect information from participants regarding their views on the optimum content or mode(s) of  
143 delivery of weaning workshops, nor the factors that need to be considered in their development and  
144 implementation in primary care settings. Due to the potential for community-based weaning  
145 workshops to support complementary infant feeding behaviours and the scant existing evidence  
146 internationally to inform appropriate development and implementation, further exploration of such  
147 interventions is needed.

148 This study aims to:

- 149 • Investigate current practice regarding the delivery of weaning workshops within Irish primary  
150 care settings,
- 151 • To explore the experiences and opinions of community dietitians regarding the optimal  
152 content and modes of delivery of weaning workshops, and
- 153 • To identify the key factors that should be considered to facilitate the development and  
154 implementation of effective and sustainable weaning workshops within routine primary care  
155 from the perspectives of community dietitians.

156

## 157 **Methods:**

### 158 **Study design**

159 The research adopted a quantitative approach using a cross-sectional survey distributed to  
160 community-based dietitians working in the Irish primary healthcare service. We obtained ethical  
161 approval from the School of Public Health Internal Social Research Ethics Committee in University  
162 College Cork. The STROBE checklist for cross-sectional studies (34) was used to inform reporting of the  
163 findings (Appendix 1).

164

### 165 **Sampling and recruitment**

166 All community-based HSE dietitians based in Ireland were eligible to participate in the study. After  
167 consultation with a senior community dietitian in primary care (JOH), it was established that there are  
168 approximately 90 community-based dietitians in Ireland were eligible to participate in the study. The  
169 survey was set up using 'Lime Survey', an online resource for hosting surveys and questionnaires. An

170 email inviting all community-based HSE dietitians in Ireland was sent by a primary care dietitian  
171 manager (YOB) in the Cork area from May-June 2019. One reminder email was sent within this  
172 timeframe. The invitation email included an information sheet outlining the nature of the research, a  
173 link to the survey and instructions for obtaining consent. Before emailing, the survey was piloted with  
174 two participants (a researcher with a nutritional background and a dietitian), after which minor  
175 refinements were made to the wording of questions. The pilot responses were not included in the  
176 analysis.

177

### 178 **Data Collection**

179 A 34-item survey was developed based on existing literature in conjunction with an unpublished  
180 report by the Health Service Executive (12, 29, 33, 35). In the first section, participants were asked to  
181 provide their age category, gender, CHO area, length of time qualified, whether they worked in  
182 primary care or health promotion and current position. The second section asked participants about  
183 current weaning workshops service offerings in their CHO area. Specifically, participants were asked  
184 questions about workshop characteristics including frequency, provider, content and resources  
185 required, and about attendee characteristics, e.g. numbers in attendance, average parent/caregiver  
186 type (e.g. mothers, fathers, grandparents etc), average socioeconomic status, average age of infant  
187 and their views on the general reception by attendees regarding the workshops. The next section  
188 asked participants about their specific experience and opinions of delivering weaning workshops, and  
189 their views of the factors influencing the development and delivery of weaning workshops and  
190 attendance by parents/caregivers. All of the above items were closed-ended questions with multiple-  
191 choice answers provided (n=30 items). Four open-ended questions were also included to capture  
192 participants' views on 1) reasons that workshops are currently not available in their area (if  
193 applicable), 2) the most important factors to consider in development and delivery of weaning  
194 workshops, 3) recommendations regarding existing services and 3) any additional comments. We  
195 defined weaning workshops for participants as 'any community-based, group-based classes that aim  
196 to address complementary feeding and the introduction of solid foods for parents and primary  
197 caregivers of infants and children'. The full questionnaire is provided in Appendix 2.

198

### 199 **Data analysis**

200 The data were cleaned and then transferred into STATA (version 13) for analysis. A descriptive  
201 univariate analysis was conducted by CF for all dietitians' characteristics, workshop characteristics and  
202 reported attendee characteristics, providing sample numbers and percentages. We used chi-squared  
203 test for categorical variables to present differences between responses from dietitians who had

204 experience of delivering workshops and those who did not, but we did not calculate significance or p-  
205 values due to the small samples involved. All surveys were returned complete but scattered missing  
206 data reduced the sample size for some variables (further data provided on missing data in Appendix  
207 3). In items that allowed for multiple responses ('tick all that apply'), categories were created for most  
208 of the matching responses. For all additional responses, an 'other' category was created. Data from all  
209 four open-ended questions were analysed by ET using a conventional content analysis approach  
210 outlined by Hsieh and Shannon (2005) (36). This approach was chosen due to the likelihood of minimal  
211 depth and richness of responses. After reading and data familiarisation, ET highlighted text that  
212 captured key concepts and meaning from responses. These key concepts were then summarised,  
213 producing initial codes, which were refined and sorted into overarching categories which were  
214 subsequently discussed with CF.

215

216

## 217 **Results:**

### 218 ***Dietitians' characteristics***

219 A total of 90 dietitians were invited to participate in this study; 47 (52%) consented to participate.  
220 Most participants were in the 31-40 years of age bracket (n=17, 39.5%). Community dietitians were  
221 predominantly female (n=41, 97.6%), based in primary care (n=33, 80.5%) and working as a dietitian  
222 for 1-5 years (n=14, 35%). Representation varied across the 9 CHO areas represented, ranging from 0  
223 (CHO area 2) to 12 (28.6%) from CHO area 4. Most participants were in a senior dietitian role (n=31,  
224 73.8%) (See Table 1).

225

226

**Insert Table 1 here**

227

### 228 ***Dietitians' characteristics and experience of delivering weaning workshops***

229 Data for delivery of weaning workshops were available for 30 participants, with most dietitians  
230 reporting not having delivered weaning workshops (n=19, 63.3%) (Table 2). Of the dieticians that had  
231 personally delivered weaning workshops previously, most were aged between 41-50 years (n=6,  
232 54.6%), based in primary care (n=9, 81.8%) and in a senior dietitian's role (n=9, 81.8%). Characteristics  
233 were mostly similar for dietitians who had not delivered workshops previously, with the majority aged  
234 between 31-40 years (n=8, 42.1%), based in primary care (n=14, 73.7%) and in a senior dietitian role  
235 (n=14, 73.7%). The findings of chi-squared tests are presented in Tables 2-4, with data for dieticians  
236 with experience of delivery presented separately to those without experience.

237



238  
239  
240  
241  
242  
243  
244  
245  
246  
247  
248  
249  
250  
251  
252  
253  
254  
255  
256  
257  
258  
259  
260  
261  
262  
263  
264  
265  
266  
267  
268  
269  
270  
271

**Insert Table 2**

***Dietitians' perceptions of workshop attendees***

The majority of dietitians who have delivered weaning workshops (n=9, 81.8%) reported that parents who attend weaning workshops are mostly of medium socioeconomic status. Of those who had delivered weaning workshops, the majority indicated that only mothers (n=9, 81.8%) with their infants (n=11, 100.0%), aged 4-7 months (n=8, 72.9%) attended weaning workshops. Most dietitians who had not delivered a weaning workshop answered 'I don't know' to most of the questions including 'who attends weaning workshop's (n=7, 53.9%), 'parents' socioeconomic status' (n=6, 50.0%), 'how many attended a weaning workshop class' (n=5, 45.5%) and 'how parents were referred' to a weaning workshop (n=5, 45.5%). Finally, the majority of dietitians who had delivered weaning workshops reported attendees' feedback as 'excellent' (n=7, 63.6%) (Table 3).

**Insert Table 3 here**

***Weaning workshop format, content, development, and delivery of weaning workshops***

Of the eleven dietitians who had previously delivered a workshop, 36.4% (n=4) reported that workshops were delivered by community dietitians in collaboration with public health nurses, while 45.5% did not know what other healthcare professionals were also involved in delivering weaning workshops (Table 4). Of dietitians with experience of delivering weaning workshops, 54.6% reported that workshop content included discussion on the timing of introduction of solid foods; responding to infant cues; stages of food textures, allergies, and baby-led weaning (n=6). According to the dietitians with experience, weaning workshops were evaluated using either informal participant feedback (n=3, 27.3%) or formal evaluation of opinions (n=3, 27.3%). For those who had delivered weaning workshops, the majority (n=4, 44.4%) mostly indicated that the time taken to travel to workshops was approximately 21-40 minutes, and to prepare for the workshops was 41-60 minutes. Most dietitians who had not delivered a weaning workshop did not know how weaning workshops were developed (n=16, 84.2%) or promoted (n=4, 36.6%), with some indicating that promotion was through other healthcare professionals (n=6, 54.6%). When asked about the cost of weaning workshops in terms of resources needed such as room hire or equipment, of those who had delivered weaning workshops, 36.4% reported no cost (n=4), with 18.2% reporting €101- €200 (n=2).

**Insert Table 4 here**

272 **Factors influencing the development and delivery of workshops**

273 Participants identified resource constraints and a lack of staffing as primary reasons that workshops  
274 were not currently offered within their area. Participants also identified several factors they felt should  
275 be considered in the future development and delivery of weaning workshops. These include workshop  
276 characteristics such as appropriate content, timing, venue and mode of delivery, as well as  
277 organizational characteristics such as the availability of resources, multidisciplinary team (MDT)  
278 involvement, and attendee characteristics. One participant felt that weaning workshops were not  
279 needed within primary care. This data is further described in Table 5 which also provides the numbers  
280 of participants who identified each factor and sample quotes.

281

282

**Insert Table 5 here**

283

284 Overall, many participants regardless of their experience of delivery highlighted that workshops  
285 should be standardized and structured, and that content and associated materials should be practical  
286 and interactive, evidence-based and cover topics like responsive feeding, the potential influence of  
287 the infant feeding industry and stages of textures. For example, one participant wrote that there is a  
288 need for a '*nationally agreed referral pathway with a structured programme incorporated as part of*  
289 *the dietetic service to primary care*'. Dietitians also identified that workshops should be appropriate  
290 to the child age/stage, e.g., to be run a few times a year to engage with parents and caregivers at  
291 appropriate times, and be held in child-friendly venues, at no cost to participants with one stating  
292 '*because Mums attend with children it is necessary to have the workshop in a room that caters for*  
293 *children*'. Regarding the resources needed to develop and implement these workshops, participants  
294 identified that availability of staff including administrative support was crucial. They also stated that  
295 MDT involvement was crucial both in terms of recruiting or referring attendees to the workshop, and  
296 in the development and delivery of workshops, as one participant remarked, '*it needs to be inclusive*  
297 *of all relevant disciplines*'. Finally, in relation to attendee characteristics, dietitians stated the  
298 importance of running workshops for parents and/or caregivers with greatest need, e.g. with a  
299 particular focus on engaging families from lower socio-economic status backgrounds, '*The mums that*  
300 *attend is [sic] generally very interested in good nutrition and probably have read widely on the subject*  
301 *prior to attending. Unfortunately, it is difficult to get the mums who really need education on baby*  
302 *weaning to attend*'.

303

304 **Discussion**

305 This study provides an overview of current practice regarding the delivery of weaning workshops  
306 within the Irish primary healthcare service. The study also provides insight into the experiences and  
307 opinions of primary care community dietitians regarding the development and delivery of weaning  
308 workshops in terms of optimal content and delivery options. Overall, only 11 dietitians reported  
309 experience of personally delivering weaning workshops. Sixteen dietitians reported that workshops  
310 were run in their area with variable frequency, with ten reporting that workshops were never run in  
311 their area. Participants reported that mostly only mothers of medium socioeconomic status attended  
312 weaning workshops when infants were aged between 4-7 months, and that feedback from attendees  
313 was mostly positive. Dietitians identified the key factors needing to be considered in the future  
314 development and delivery of weaning workshops as workshop characteristics such as content, timing  
315 and venue, organisational characteristics such as the availability of resources and multidisciplinary  
316 involvement, and attendee characteristics such as socioeconomic status.

317

318 This study highlights substantial variability in current practice regarding weaning workshops in Irish  
319 primary care, with workshops being run in some areas by some dietitians but not in others, as well as  
320 a lack of standardisation regarding the provider, content, and frequency of workshops where  
321 workshops are being delivered. We also identified a distinct lack of clarity and knowledge amongst  
322 dietitians regarding what current practice is regarding weaning workshops, with many reporting 'don't  
323 know' responses. However, participants agreed on several key factors to be considered for the future  
324 development and implementation of weaning workshops. Like other studies in this area, the timing of  
325 weaning workshops and ensuring appropriateness of the workshop to the child age/stage was a crucial  
326 factor identified by dietitians in this study. Previous research has indicated that mothers are more  
327 responsive to personalised approaches within infant feeding interventions (37, 38) and that tailoring  
328 workshops to target different stages of infant development is important to optimise their  
329 effectiveness (29). Previous intervention studies have indicated that interventions initiated  
330 antenatally (39) or up to 10 weeks after birth (40, 41) can be effective in promoting appropriate infant  
331 feeding (29). However, this study found that workshops currently offered involve infants between 4-  
332 7 months of age, with no dietitian reporting workshops delivered to parents with infants aged 0-3  
333 months. Given the fact that infants are often introduced to solids before four months, and sometimes  
334 as early as 12 weeks as outlined earlier (3-7), this further highlights the importance of carefully  
335 considering the timing of such programmes. Weekly or fortnightly workshops with continuous advice  
336 provided for all stages of development might help to improve infant feeding practices and nutritional  
337 habits.

338

339 This study also highlights the importance of targeting weaning workshops and infant feeding  
340 programmes towards the areas of most need. A common theme identified by participants was the  
341 need to engage parents and caregivers from lower socioeconomic status backgrounds; however,  
342 dietitians also reported that workshops are currently predominantly attended by mothers of medium  
343 socioeconomic status. Existing guidance emphasises the importance of different intervention  
344 approaches which can focus on deprived groups (29) to target the recurring relationship that exists  
345 between socioeconomic status and inappropriate infant feeding practices (35, 42, 43). Previous  
346 studies have identified maternal education and socioeconomic status as factors which predict poor  
347 infant feeding behaviours (44, 45). Given that participants identified the availability of resources (e.g.  
348 staff time, cost) as a key factor influencing the development and delivery of weaning workshops, in  
349 resource constrained settings it is likely to be particularly important to prioritise the provision of  
350 workshops for parents and caregivers from more deprived backgrounds. A previous evaluation of  
351 infant-feeding workshops amongst women living in areas of high deprivation found that a relatively  
352 short education intervention can enhance women's knowledge and understanding of weaning (29).  
353 While demographic factors are unmodifiable, there is scope to focus on and influence modifiable  
354 factors such as women's beliefs about infant feeding (35, 46). Therefore, the future development and  
355 implementation of weaning workshops should consider important aspects such as accessibility and  
356 cost, providing workshops in appropriate locations at different times, free of charge that do not incur  
357 additional expenses on attendees (e.g. childcare, parking), with more concerted efforts to specifically  
358 engage with and target families of lower socioeconomic status.

359  
360 Dietitians in this study perceived mothers' feedback on these weaning workshops as 'excellent'.  
361 Similarly, a study which evaluated infant-feeding workshops for women from deprived areas, found  
362 the workshops were generally rated positively while also being seen as an accessible source of  
363 education (29). Furthermore, several other studies found that after attending educational and  
364 practical workshops on infant feeding and complementary feeding women appeared to have  
365 improved knowledge, understanding and confidence with many following the current infant feeding  
366 recommendations (37, 38, 41). While data such as this is encouraging, future research should formally  
367 evaluate attendees' experiences, levels of knowledge and infant feeding behaviours prior to and  
368 following attendance at weaning workshops to ensure that content is clear and comprehensive.

### 369 370 **Limitations**

371 A main limitation of this survey is that information provided on parent/primary caregiver attendees is  
372 from dietitian self-report and as we did not collect data on time since delivering workshops, it may

373 also be influenced by participant recall. We did not have the resources to also collect data from  
374 parent/caregivers, therefore future research should explore weaning workshops with attendees to  
375 obtain a more comprehensive understanding of the phenomenon in question. In items that allowed  
376 for multiple responses ('tick all that apply'), variables were re-categorised for the analysis, easy  
377 interpretation and presentation of results (47). However, by doing this, some information is lost, so  
378 caution must be used when interpreting the results. 'Tick all that apply' answer format in  
379 questionnaires do not require respondents to differentiate between the answer responses, therefore  
380 a series of forced choice Yes/No questions should be used as recommended by Rasinski, Mingay, and  
381 Bradburn (1994) in future research (48). In addition, only 11 participants reported first-hand  
382 experience of delivering weaning workshops and as such, some responses may have been more  
383 directly informed by tacit experience of delivering weaning workshops than others. However, our chi-  
384 squared tests showed no observed patterns of difference between the overall responses of those with  
385 and without experience, and we felt it important to include the views of all participants, as some may  
386 have been involved in commissioning or organising rather than delivery or may have drawn on other  
387 relevant experience. We also felt it was important to include the views of all dietitians who might  
388 potentially be involved in the delivery of future workshops to gives a more inclusive overview of  
389 potential factors and barriers/facilitators to consider.

390

## 391 **Conclusions**

392 This study provides a snapshot of current delivery of community-based weaning workshops within the  
393 Irish health service. Using a cross-sectional survey, community-based dietitians perceived participants'  
394 feedback on weaning workshops as excellent, while highlighting issues around optimal timing and  
395 delivery of workshops. Furthermore, the findings highlight that future research needs to focus on how  
396 to engage families of lower socioeconomic status and the impact of these workshops on behaviour  
397 change, taking into consideration key factors such as accessibility and cost. Although based within an  
398 Irish setting, the need to support complementary feeding and subsequent rationale for establishing  
399 weaning workshops are extremely pertinent internationally. Given the dearth of evidence in this area,  
400 the insights provided by participants of this study regarding the development and delivery of weaning  
401 workshops, in terms of optimal content and delivery options, will make a valuable contribution to this  
402 field.

403

404

## 405 References

- 406 1. Organization WH, UNICEF. Global Strategy on Infant and Young Child Feeding. Available in:  
407 [https://apps](https://apps.who.int/iris/bitstream/handle/10665/42590/9241562218.pdf) who int/iris/bitstream/handle/10665/42590/9241562218 pdf. 2003.
- 408 2. Organization WH. Complementary feeding: report of the global consultation, and summary  
409 of guiding principles for complementary feeding of the breastfed child. 2003.
- 410 3. Spaniol AM, da Costa THM, Souza AM, Gubert MB. Early consumption of ultra-processed  
411 foods among children under 2 years old in Brazil. *Public Health Nutr.* 2020;1-11.
- 412 4. Barrera CM, Hamner HC, Perrine CG, Scanlon KS. Timing of Introduction of Complementary  
413 Foods to US Infants, National Health and Nutrition Examination Survey 2009-2014. *Journal of the*  
414 *Academy of Nutrition and Dietetics.* 2018;118(3):464-70.
- 415 5. Castro PD, Kearney J, Layte R. A study of early complementary feeding determinants in the  
416 Republic of Ireland based on a cross-sectional analysis of the Growing Up in Ireland infant cohort.  
417 *Public health nutrition.* 2015;18(2):292-302.
- 418 6. Tarrant RC, Younger KM, Sheridan-Pereira M, White MJ, Kearney JM. Factors associated with  
419 weaning practices in term infants: a prospective observational study in Ireland. *British journal of*  
420 *nutrition.* 2010;104(10):1544-54.
- 421 7. McSweeney M, Kevany J. A national survey of infant feeding practices in Ireland 1981: a  
422 preliminary report. *Irish medical journal.* 1982;75(12):452-5.
- 423 8. Tarrant R. An investigation of the diets of infants born in Ireland during the first six months  
424 of life. Dublin: Dublin Institute of Technology. 2008.
- 425 9. Ireland FSAo. Scientific recommendations for a national infant feeding policy: Food Safety  
426 Authority of Ireland; 2011.
- 427 10. Fall CH, Borja JB, Osmond C, Richter L, Bhargava SK, Martorell R, et al. Infant-feeding  
428 patterns and cardiovascular risk factors in young adulthood: data from five cohorts in low- and  
429 middle-income countries. *Int J Epidemiol.* 2011;40(1):47-62.
- 430 11. Gutiérrez-Camacho C, Méndez-Sánchez L, Klünder-Klünder M, Clark P, Denova-Gutiérrez E.  
431 Association between Sociodemographic Factors and Dietary Patterns in Children Under 24 Months  
432 of Age: A Systematic Review. *Nutrients.* 2019;11(9).
- 433 12. Matvienko-Sikar K, Kelly C, Sinnott C, McSharry J, Houghton C, Heary C, et al. Parental  
434 experiences and perceptions of infant complementary feeding: a qualitative evidence synthesis.  
435 *Obesity Reviews.* 2018;19(4):501-17.
- 436 13. Spyreli E, McKinley MC, Dean M. Parental considerations during complementary feeding in  
437 higher income countries: a systematic review of qualitative evidence. *Public Health Nutrition.*  
438 2021;1-14.
- 439 14. Waters E, de Silva-Sanigorski A, Burford BJ, Brown T, Campbell KJ, Gao Y, et al. Interventions  
440 for preventing obesity in children. *Cochrane database of systematic reviews.* 2011(12).
- 441 15. Redsell SA, Edmonds B, Swift JA, Siriwardena AN, Weng S, Nathan D, et al. Systematic review  
442 of randomised controlled trials of interventions that aim to reduce the risk, either directly or  
443 indirectly, of overweight and obesity in infancy and early childhood. *Matern Child Nutr.*  
444 2016;12(1):24-38.
- 445 16. Graziose MM, Downs SM, O'Brien Q, Fanzo J. Systematic review of the design,  
446 implementation and effectiveness of mass media and nutrition education interventions for infant  
447 and young child feeding. *Public Health Nutrition.* 2018;21(2):273-87.
- 448 17. Toomey E, Matvienko-Sikar K, Heary C, Delaney L, Queally M, Hayes CB, et al. Intervention  
449 fidelity within trials of infant feeding behavioral interventions to prevent childhood obesity: a  
450 systematic review. *Annals of Behavioral Medicine.* 2019;53(1):75-97.
- 451 18. World Health Organization. Primary health care: closing the gap between public health and  
452 primary care through integration. Geneva: World Health Organization; 2018 2018. Contract No.:  
453 WHO/HIS/SDS/2018.49.
- 454 19. World Health Organisation. Global Status Report on noncommunicable diseases 2014.  
455 Geneva, Switzerland; 2014.

- 456 20. Vine M, Hargreaves MB, Briefel RR, Orfield C. Expanding the Role of Primary Care in the  
457 Prevention and Treatment of Childhood Obesity: A Review of Clinic- and Community-Based  
458 Recommendations and Interventions. *Journal of Obesity*. 2013;2013:172035.
- 459 21. Toomey E, Flannery C, Matvienko-Sikar K, Olander EK, Hayes C, Heffernan T, et al. Exploring  
460 healthcare professionals' views of the acceptability of delivering interventions to promote healthy  
461 infant feeding practices within primary care: a qualitative interview study. *Public Health Nutrition*.  
462 2020;1-11.
- 463 22. Furlong M, McGilloway S. The Incredible Years Parenting program in Ireland: A qualitative  
464 analysis of the experience of disadvantaged parents. *Clinical Child Psychology and Psychiatry*.  
465 2012;17(4):616-30.
- 466 23. Gardner F, Leijten P, Mann J, Landau S, Harris V, Beecham J, et al. Could scale-up of  
467 parenting programmes improve child disruptive behaviour and reduce social inequalities? Using  
468 individual participant data meta-analysis to establish for whom programmes are effective and cost-  
469 effective. *Public Health Research*. 2017;5(10).
- 470 24. Leijten P, Raaijmakers MAJ, Orobio de Castro B, van den Ban E, Matthys W. Effectiveness of  
471 the Incredible Years Parenting Program for Families with Socioeconomically Disadvantaged and  
472 Ethnic Minority Backgrounds. *Journal of Clinical Child & Adolescent Psychology*. 2017;46(1):59-73.
- 473 25. Reid MJ, Webster-Stratton C, Baydar N. Halting the development of conduct problems in  
474 Head Start children: The effects of parent training. *Journal of Clinical Child and Adolescent*  
475 *Psychology*. 2004;33(2):279-91.
- 476 26. Love P, Laws R, Litterbach E, Campbell KJ. Factors Influencing Parental Engagement in an  
477 Early Childhood Obesity Prevention Program Implemented at Scale: The Infant Program. *Nutrients*.  
478 2018;10(4):509.
- 479 27. Gardner F, Burton J, Klimes I. Randomised controlled trial of a parenting intervention in the  
480 voluntary sector for reducing child conduct problems: outcomes and mechanisms of change. *Journal*  
481 *of child psychology and psychiatry*. 2006;47(11):1123-32.
- 482 28. Gardner F, Hutchings J, Bywater T, Whitaker C. Who benefits and how does it work?  
483 Moderators and mediators of outcome in an effectiveness trial of a parenting intervention. *Journal*  
484 *of Clinical Child & Adolescent Psychology*. 2010;39(4):568-80.
- 485 29. Andrews E, Symon A, Anderson A. 'I didn't know why you had to wait': an evaluation of NHS  
486 infant-feeding workshops amongst women living in areas of high deprivation. *Journal of Human*  
487 *Nutrition and Dietetics*. 2015;28(6):558-67.
- 488 30. Hesketh KD, Salmon J, McNaughton SA, Crawford D, Abbott G, Cameron AJ, et al. Long-term  
489 outcomes (2 and 3.5 years post-intervention) of the INFANT early childhood intervention to improve  
490 health behaviors and reduce obesity: cluster randomised controlled trial follow-up. *International*  
491 *Journal of Behavioral Nutrition and Physical Activity*. 2020;17(1):95.
- 492 31. Frongillo EA. Evaluation of programs to improve complementary feeding in infants and  
493 young children. *Matern Child Nutr*. 2017;13 Suppl 2(Suppl 2):e12436.
- 494 32. Martin SL, McCann JK, Gascoigne E, Allotey D, Fundira D, Dickin KL. Mixed-Methods  
495 Systematic Review of Behavioral Interventions in Low- and Middle-Income Countries to Increase  
496 Family Support for Maternal, Infant, and Young Child Nutrition during the First 1000 Days. *Curr Dev*  
497 *Nutr*. 2020;4(6):nzaa085-nzaa.
- 498 33. Executive HS. Weaning workshop unpublished report 2017.
- 499 34. von Elm E, Altman DG, Egger M, Pocock SJ, Gøtzsche PC, Vandenbroucke JP. The  
500 Strengthening the Reporting of Observational Studies in Epidemiology (STROBE) Statement:  
501 guidelines for reporting observational studies. *Int J Surg*. 2014;12(12):1495-9.
- 502 35. Alder EM, Williams FL, Anderson AS, Forsyth S, Florey CdV, Van der Velde P. What influences  
503 the timing of the introduction of solid food to infants? *British Journal of Nutrition*. 2004;92(3):527-  
504 31.
- 505 36. Hsieh H-F, Shannon SE. Three approaches to qualitative content analysis. *Qualitative health*  
506 *research*. 2005;15(9):1277-88.

- 507 37. Black MM, Siegel EH, Abel Y, Bentley ME. Home and videotape intervention delays early  
508 complementary feeding among adolescent mothers. *Pediatrics*. 2001;107(5):e67-e.
- 509 38. Brophy-Herb HE, Silk K, Horodynski MA, Mercer L, Olson B. Key theoretical frameworks for  
510 intervention: understanding and promoting behavior change in parent–infant feeding choices in a  
511 low-income population. *The journal of primary prevention*. 2009;30(2):191-208.
- 512 39. McCormick F, Moreton J, D'Souza L, King S, McFadden A, Renfrew M. Review 5: The  
513 effectiveness of public health interventions to improve the nutrition of young children aged 6-24  
514 months. London: NICE. 2007.
- 515 40. Hoare K, Wright C, Wilson P, Weaver L. Disseminating weaning messages: an intervention  
516 trial. *British journal of community nursing*. 2002;7(4):196-200.
- 517 41. Watt R, Tull K, Hardy R, Wiggins M, Kelly Y, Molloy B, et al. Effectiveness of a social support  
518 intervention on infant feeding practices: randomised controlled trial. *Journal of Epidemiology &*  
519 *Community Health*. 2009;63(2):156-62.
- 520 42. Bolling K, Grant C, Hamlyn B, Thornton A. Infant feeding survey 2005. London: The  
521 Information Centre for Health and Social Care; 2007.
- 522 43. Excellence NfC. Public Health Guidance 11: Improving the Nutrition of Pregnant and  
523 Breastfeeding Mothers and Children in Low-Income Households. London: NICE; 2008.
- 524 44. Wright CM, Parkinson K, Drewett R. Why are babies weaned early? Data from a prospective  
525 population based cohort study. *Archives of disease in childhood*. 2004;89(9):813-6.
- 526 45. Wijndaele K, Lakshman R, Landsbaugh JR, Ong KK, Ogilvie D. Determinants of early weaning  
527 and use of unmodified cow's milk in infants: a systematic review. *Journal of the American Dietetic*  
528 *Association*. 2009;109(12):2017-28.
- 529 46. Heinig MJ, Follett JR, Ishii KD, Kavanagh-Prochaska K, Cohen R, Panchula J. Barriers to  
530 compliance with infant-feeding recommendations among low-income women. *Journal of Human*  
531 *Lactation*. 2006;22(1):27-38.
- 532 47. Altman DG, Royston P. The cost of dichotomising continuous variables. *BMJ (Clinical*  
533 *research ed)*. 2006;332(7549):1080-.
- 534 48. Dillman DA, Smyth JD, Christian LM, Stern MJ, editors. Multiple answer questions in self-  
535 administered surveys: The use of check-all-that-apply and forced-choice question formats. meetings  
536 of the American Statistical Association, San Francisco, CA; 2003.

537

538



539 **Table 1. Dietitians' characteristics**

| <b>Variable</b>                           | <b>N (%)</b> |
|-------------------------------------------|--------------|
| <b><i>Age category (n=43)</i></b>         |              |
| 18-30 years                               | 7 (16.3)     |
| 31-40 years                               | 17 (39.5)    |
| 41-50 years                               | 14 (32.6)    |
| 51-60 years                               | 4 (9.3)      |
| >60 years                                 | 1 (2.3)      |
| <b><i>Gender (n=42)</i></b>               |              |
| Female                                    | 41 (97.6)    |
| Male                                      | 1 (2.4)      |
| <b><i>CHO (n=42)</i></b>                  |              |
| Area 1                                    | 3 (7.1)      |
| Area 2                                    | 0 (0.0)      |
| Area 3                                    | 3 (7.1)      |
| Area 4                                    | 12 (28.6)    |
| Area 5                                    | 4 (9.5)      |
| Area 6                                    | 7 (16.7)     |
| Area 7                                    | 5 (11.9)     |
| Area 8                                    | 1 (2.4)      |
| Area 9                                    | 7 (16.7)     |
| <b><i>Length in profession (n=40)</i></b> |              |
| 1-5 years                                 | 14 (35.0)    |
| 6-10 years                                | 5 (12.5)     |
| 11-15 years                               | 10 (25.0)    |
| 16-20 years                               | 10 (25.0)    |
| 21-25 years                               | 1 (2.5)      |
| <b><i>Discipline (n=41)</i></b>           |              |
| Primary care                              | 33 (80.5)    |
| Health promotion                          | 4 (9.8)      |
| Other                                     | 4 (9.8)      |
| <b><i>Current position (n=42)</i></b>     |              |
| Dietitian manager                         | 3 (7.1)      |
| Senior dietitian                          | 31 (73.81)   |
| Staff-grade dietitian                     | 8 (19.1)     |

540 CHO, Community Health Organisation; Area 1, Donegal, Sligo/Leitrim/West Cavan, Cavan/Monaghan LHOs;  
 541 Area 2, Community Healthcare West; Area 3, Mid-West Community Healthcare; Area 4, Cork Kerry Community  
 542 Healthcare; Area 5, South East Community Healthcare; Area 6, Community Healthcare East; Area 7, Community  
 543 Healthcare Dublin South, Kildare & West Wicklow; Area 8, Midlands Louth Meath Healthcare; Area 9, Dublin  
 544 North City and County Healthcare

545

546

547

548

549

550

551 **Table 2. Dietitians' characteristics and delivery of weaning workshops**

|                                     | n  | Delivered a WW (n=30) |                  |
|-------------------------------------|----|-----------------------|------------------|
|                                     |    | Yes (n=11, 36.7%)     | No (n=19, 63.3%) |
| <b>Age category</b>                 | 30 |                       |                  |
| 18-30 years                         |    | 1 (9.1)               | 3 (15.8)         |
| 31-40 years                         |    | 4 (36.4)              | 8 (42.1)         |
| 41-50 years                         |    | 6 (54.6)              | 6 (31.6)         |
| 51-60 years                         |    | 0 (0.0)               | 1 (5.3)          |
| >60 years                           |    | 0 (0.0)               | 1 (5.3)          |
| <b>Gender</b>                       | 30 |                       |                  |
| Female                              |    | 11 (100.0)            | 18 (94.7)        |
| Male                                |    | 0 (0.0)               | 1 (5.3)          |
| <b>CHO</b>                          | 30 |                       |                  |
| Area 1                              |    | 2 (18.2)              | 1 (5.3)          |
| Area 2                              |    | 0 (0.0)               | 0 (0.0)          |
| Area 3                              |    | 0 (0.0)               | 3 (15.8)         |
| Area 4                              |    | 2 (18.2)              | 4 (21.1)         |
| Area 5                              |    | 0 (0.0)               | 4 (21.1)         |
| Area 6                              |    | 2 (18.2)              | 4 (21.1)         |
| Area 7                              |    | 2 (18.2)              | 1 (5.3)          |
| Area 8                              |    | 0 (0.0)               | 0 (0.0)          |
| Area 9                              |    | 3 (27.3)              | 2 (10.5)         |
| <b>Length of time in profession</b> | 30 |                       |                  |
| 1-5 years                           |    | 2 (18.2)              | 9 (47.4)         |
| 6-10 years                          |    | 2 (18.2)              | 2 (10.5)         |
| 11-15 years                         |    | 3 (27.3)              | 4 (21.1)         |
| 16-20 years                         |    | 4 (36.4)              | 4 (21.1)         |
| 21-25 years                         |    | 0 (0.0)               | 0 (0.0)          |
| <b>Discipline</b>                   | 30 |                       |                  |
| Primary care                        |    | 9 (81.8)              | 14 (73.7)        |
| Health promotion                    |    | 2 (18.2)              | 2 (10.5)         |
| Other                               |    | 0 (0.0)               | 3 (15.8)         |
| <b>Current position</b>             | 30 |                       |                  |
| Dietitian manager                   |    | 1 (9.1)               | 1 (5.3)          |
| Senior dietitian                    |    | 9 (81.8)              | 14 (73.7)        |
| Staff-grade dietitian               |    | 1 (9.1)               | 4 (21.1)         |
| <b>Parents looking for support</b>  | 27 |                       |                  |
| Daily                               |    | 2 (18.2)              | 0 (0.0)          |
| Once a week                         |    | 4 (36.4)              | 4 (25.0)         |
| Once a month                        |    | 3 (27.3)              | 6 (37.5)         |
| Few times a year                    |    | 2 (18.2)              | 2 (12.5)         |
| Never                               |    | 0 (0.0)               | 4 (25.0)         |

552 WW, weaning workshop; CHO, Community Health Organisation

553

554

555

556

557 **Table 3. Dietitians' perceptions of those attending weaning workshops and delivery of weaning**  
558 **workshops**

| Variable                                         | n  | Delivered a WW (n=30) |                  |
|--------------------------------------------------|----|-----------------------|------------------|
|                                                  |    | Yes (n=11, 36.7%)     | No (n=19, 63.3%) |
| <b>How many attend WW (n=26)</b>                 | 22 |                       |                  |
| ≤10 participants                                 |    | 5 (45.5)              | 4 (36.4)         |
| >10 participants                                 |    | 6 (54.6)              | 2 (18.2)         |
| Don't know                                       |    | 0 (0.0)               | 5 (45.5)         |
| <b>Who attends WW (n=28)</b>                     | 24 |                       |                  |
| Both mother and father                           |    | 2 (18.2)              | 0 (0.0)          |
| Mother only                                      |    | 9 (81.8)              | 6 (46.2)         |
| Don't know                                       |    | 0 (0.0)               | 7 (53.9)         |
| <b>Parents SES (n=26)</b>                        | 23 |                       |                  |
| High                                             |    | 0 (0.0)               | 2 (16.7)         |
| Medium                                           |    | 9 (81.8)              | 4 (33.3)         |
| Low                                              |    | 0 (0.0)               | 0 (0.0)          |
| Don't know                                       |    | 2 (18.2)              | 6 (50.0)         |
| <b>Are infant present at WW (n=35)</b>           | 30 |                       |                  |
| Yes                                              |    | 11 (100.0)            | 7 (36.8)         |
| No                                               |    | 0 (0.0)               | 7 (36.8)         |
| Don't know                                       |    | 0 (0.0)               | 5 (26.3)         |
| <b>Approximation of infant age (n=24)</b>        | 21 |                       |                  |
| 1-3 months                                       |    | 0 (0.0)               | 0 (0.0)          |
| 4-7 months                                       |    | 8 (72.9)              | 5 (50.0)         |
| 8+ months                                        |    | 0 (0.0)               | 0 (0.0)          |
| Don't know                                       |    | 3 (27.3)              | 5 (50.0)         |
| <b>How are they referred to WW (n=25)</b>        | 22 |                       |                  |
| Self-referral                                    |    | 2 (18.2)              | 2 (18.2)         |
| GP referral                                      |    | 0 (0.0)               | 0 (0.0)          |
| Public health nurse                              |    | 5 (45.5)              | 4 (36.4)         |
| Community dietitian referral                     |    | 0 (0.0)               | 0 (0.0)          |
| Other                                            |    | 4 (36.4)              | 5 (45.5)         |
| <b>Perceptions of attendees' feedback (n=12)</b> | 12 |                       |                  |
| Excellent                                        |    | 7 (63.6)              | 0 (0.0)          |
| Very good                                        |    | 3 (27.3)              | 1 (100.0)        |
| Good                                             |    | 1 (9.1)               | 0 (0.0)          |
| Poor                                             |    | 0 (0.0)               | 0 (0.0)          |
| Very poor                                        |    | 0 (0.0)               | 0 (0.0)          |

559 WW, weaning workshops

560

561

562

563

564

565

566 **Table 4. Weaning workshop format, content, development, and delivery of weaning workshops**

| Variable                                    | n         | Delivered a WW (n=30) |                  |
|---------------------------------------------|-----------|-----------------------|------------------|
|                                             |           | Yes (n=11, 36.7%)     | No (n=19, 63.3%) |
| <b><i>Who delivers WW (n=25)</i></b>        | <b>21</b> |                       |                  |
| Community dietitian only                    |           | 1 (9.1)               | 0 (0.0)          |
| Public Health Nurse only                    |           | 1 (9.1)               | 6 (60.0)         |
| Community dietitian and public nurse        |           | 4 (36.4)              | 2 (20.0)         |
| Don't know                                  |           | 5 (45.5)              | 2 (20.0)         |
| <b><i>Frequency of WW (n=40)</i></b>        | <b>30</b> |                       |                  |
| Once a month                                |           | 4 (36.4)              | 4 (21.1)         |
| Once a fortnight                            |           | 0 (0.0)               | 0 (0.0)          |
| Every 4 months                              |           | 2 (18.2)              | 0 (0.0)          |
| Twice a year                                |           | 1 (9.1)               | 0 (0.0)          |
| Never                                       |           | 0 (0.0)               | 8 (42.1)         |
| Don't know                                  |           | 4 (36.4)              | 7 (36.8)         |
| <b><i>Topics discussed at WW (n=24)</i></b> | <b>21</b> |                       |                  |
| Timing of introduction of solid foods       |           | 0 (0.0)               | 0 (0.0)          |
| Responding to infant cues                   |           | 0 (0.0)               | 0 (0.0)          |
| Stages of food textures                     |           | 2 (18.2)              | 3 (30.00)        |
| Allergies                                   |           | 0 (0.0)               | 0 (0.0)          |
| Baby-led weaning                            |           | 0 (0.0)               | 1 (10.0)         |
| All the above                               |           | 6 (54.6)              | 0 (0.0)          |
| Other                                       |           | 3 (27.3)              | 1 (10.0)         |
| Don't know                                  |           | 0 (0.0)               | 5 (50.0)         |
| <b><i>Resources used at WW (n=23)</i></b>   | <b>21</b> |                       |                  |
| Videos                                      |           | 0 (0.0)               | 0 (0.0)          |
| Power point slides                          |           | 0 (0.0)               | 0 (0.0)          |
| Cooking demo                                |           | 1 (9.1)               | 1 (10.0)         |
| Healthy Ireland 'Feeding your baby' booklet |           | 2 (18.2)              | 2 (20.0)         |
| 101 Square Meals Cookbook                   |           | 0 (0.0)               | 0 (0.0)          |
| Self-developed booklets/leaflets            |           | 0 (0.0)               | 0 (0.0)          |
| Food display                                |           | 0 (0.0)               | 0 (0.0)          |
| All the above                               |           | 1 (9.1)               | 0 (0.0)          |
| Other                                       |           | 7 (63.6)              | 0 (0.0)          |
| Don't know                                  |           | 0 (0.0)               | 7 (70.0)         |
| <b><i>How WW are developed (n=30)</i></b>   | <b>30</b> |                       |                  |
| Self-developed                              |           | 0 (0.0)               | 0 (0.0)          |
| By HSE primary care dietitian in your area  |           | 3 (27.3)              | 0 (0.0)          |
| By another HCP                              |           | 1 (9.1)               | 2 (10.5)         |
| Adapted from another HSE area               |           | 4 (36.4)              | 1 (5.3)          |
| Don't know                                  |           | 3 (27.3)              | 16 (84.2)        |
| <b><i>How WW are promoted (n=25)</i></b>    | <b>22</b> |                       |                  |
| Social media                                |           | 0 (0.0)               | 0 (0.0)          |
| Community centre                            |           | 1 (9.1)               | 1 (9.1)          |
| Suggested by HCPs                           |           | 6 (54.6)              | 6 (54.6)         |
| Other                                       |           | 4 (36.6)              | 0 (0.0)          |
| Don't know                                  |           | 0 (0.0)               | 4 (36.6)         |

568 **Table 4. Weaning workshop format, content, development, and delivery of weaning workshops**  
569 **(continued)**

| Variable                                   | n  | Delivered a WW (n=30) |                  |
|--------------------------------------------|----|-----------------------|------------------|
|                                            |    | Yes (n=11, 36.7%)     | No (n=19, 63.3%) |
| <b>How WW are evaluated (n=19)</b>         | 19 |                       |                  |
| Informal participant feedback              |    | 3 (27.3)              | 0 (0.0)          |
| Formal evaluation of opinions              |    | 3 (27.3)              | 0 (0.0)          |
| Formal evaluation of weaning knowledge     |    | 1 (9.1)               | 0 (0.0)          |
| Formal evaluation of weaning self-efficacy |    | 1 (9.1)               | 0 (0.0)          |
| Other                                      |    | 3 (27.3)              | 0 (0.0)          |
| Don't know                                 |    | 0 (0.0)               | 8 (100.0)        |
| <b>Cost of WW(n=21)</b>                    | 21 |                       |                  |
| No cost                                    |    | 4 (36.4)              | 2 (20.0)         |
| €0-50                                      |    | 0 (0.0)               | 0 (0.0)          |
| €51-100                                    |    | 0 (0.0)               | 0 (0.0)          |
| €101-200                                   |    | 2 (18.2)              | 0 (0.00)         |
| €201-500                                   |    | 0 (0.0)               | 0 (0.0)          |
| Other                                      |    | 2 (18.2)              | 0 (0.0)          |
| Don't know                                 |    | 2 (18.2)              | 8 (80.0)         |
| <b>Time to travel to WW (n=10)</b>         | 10 |                       |                  |
| 0-10 mins                                  |    | 3 (3.3)               | 1 (100.0)        |
| 11-20 mins                                 |    | 0 (0.0)               | 0 (0.0)          |
| 21-40 mins                                 |    | 4 (44.4)              | 0 (0.0)          |
| 41-60 mins                                 |    | 2 (22.2)              | 0 (0.0)          |
| >60mins                                    |    | 0 (0.0)               | 0 (0.0)          |
| Don't know                                 |    | 0 (0.0)               | 0 (0.0)          |
| <b>Time to prepare for WW (n=12)</b>       | 12 |                       |                  |
| 0-10 mins                                  |    | 2 (18.2)              | 0 (0.0)          |
| 11-20 mins                                 |    | 2 (18.2)              | 1 (100.0)        |
| 21-40 mins                                 |    | 2 (18.2)              | 0 (0.0)          |
| 41-60 mins                                 |    | 4 (36.4)              | 0 (0.0)          |
| >60mins                                    |    | 1 (9.1)               | 0 (0.0)          |
| Don't know                                 |    | 0 (0.0)               | 0 (0.0)          |
| <b>Time to close WW (n=11)</b>             | 11 |                       |                  |
| 0-10 mins                                  |    | 3 (30.0)              | 0 (0.0)          |
| 11-20 mins                                 |    | 5 (50.0)              | 1 (100.0)        |
| 21-40 mins                                 |    | 2 (20.0)              | 0 (0.0)          |
| 41-60 mins                                 |    | 0 (0.0)               | 0 (0.0)          |
| >60mins                                    |    | 0 (0.0)               | 0 (0.0)          |
| Don't know                                 |    | 0 (0.0)               | 0 (0.0)          |
| <b>Other time needed for WW (n=4)</b>      | 4  |                       |                  |
| 0-10 mins                                  |    | 0 (0.0)               | 0 (0.0)          |
| 11-20 mins                                 |    | 2 (66.7)              | 0 (0.0)          |
| 21-40 mins                                 |    | 0 (0.0)               | 0 (0.0)          |
| 41-60 mins                                 |    | 0 (0.0)               | 0 (0.0)          |
| >60mins                                    |    | 1 (33.3)              | 0 (0.0)          |
| Don't know                                 |    | 0 (0.0)               | 1 (100.0)        |

570 WW, weaning workshops; HCP, health care professional: HSE, Health Service Executive

571 **Table 5. Factors to consider in the development and delivery of workshops**

| Category                 | Factors<br><i>(n=number of respondents who identified this)</i>                                                                                                                                                                                        | Example quotes                                                                                                                                                                                                                                                                                                                                                                                                                                                                                                                                                                                                                                                                                                                                                                                                                                                                                                                                                                      |
|--------------------------|--------------------------------------------------------------------------------------------------------------------------------------------------------------------------------------------------------------------------------------------------------|-------------------------------------------------------------------------------------------------------------------------------------------------------------------------------------------------------------------------------------------------------------------------------------------------------------------------------------------------------------------------------------------------------------------------------------------------------------------------------------------------------------------------------------------------------------------------------------------------------------------------------------------------------------------------------------------------------------------------------------------------------------------------------------------------------------------------------------------------------------------------------------------------------------------------------------------------------------------------------------|
| Workshop characteristics | <b>Content:</b> <ul style="list-style-type: none"> <li>• Practical and interactive (n=5)</li> <li>• Standardised/structured (n=4)</li> <li>• Evidence-based (n=3)</li> <li>• Responsive feeding/industry influence/stages of textures (n=3)</li> </ul> | <ul style="list-style-type: none"> <li>• <i>'Any program should be interesting and interactive'</i></li> <li>• <i>'Using existing materials to avoid duplication &amp; save time, standardisation of material if possible'</i></li> <li>• <i>'Nationally standardised weaning workshops available online and offline should be available for new parents and carers'</i></li> <li>• <i>'Very important that there is more out there for parents/ families re weaning advice - especially evidence-based and safe advice!'</i></li> <li>• <i>'We also need to ensure messages around responsive feeding are shared with parents'</i></li> <li>• <i>'Nationally agreed referral pathway with a structured programme incorporated as part of the dietetic service to primary care'</i></li> <li>• <i>'Most important component re weaning is to make sure textures are introduced in a timely fashion. We see many fussy eaters who took pureed foods for far too long'</i></li> </ul> |
|                          | <b>Timing:</b> <ul style="list-style-type: none"> <li>• Appropriate to child age/stage (n=5)</li> </ul>                                                                                                                                                | <ul style="list-style-type: none"> <li>• <i>'To have them running a few times a year, to ensure you are able to see families at appropriate times'</i></li> <li>• <i>'National weaning program - offered to all parents when their baby is between 3 and 6 months'</i></li> </ul>                                                                                                                                                                                                                                                                                                                                                                                                                                                                                                                                                                                                                                                                                                   |
|                          | <b>Venue:</b> <ul style="list-style-type: none"> <li>• Appropriate baby-friendly location (n=7)</li> </ul>                                                                                                                                             | <ul style="list-style-type: none"> <li>• <i>'Because Mums attend with children it is necessary to have the workshop in a room that caters for children'</i></li> </ul>                                                                                                                                                                                                                                                                                                                                                                                                                                                                                                                                                                                                                                                                                                                                                                                                              |
|                          | <b>Mode of delivery:</b> <ul style="list-style-type: none"> <li>• Accessible and free (n=4)</li> <li>• Use of peer leaders (n=1)</li> </ul>                                                                                                            | <ul style="list-style-type: none"> <li>• <i>'That they are accessible to all and free of charge'</i></li> <li>• <i>'I do enjoy delivering the workshops myself, but appreciate that to scale up the trained [peer] tutor led approach would work best'</i></li> </ul>                                                                                                                                                                                                                                                                                                                                                                                                                                                                                                                                                                                                                                                                                                               |
| Resources                | <ul style="list-style-type: none"> <li>• Staff time/availability (n=8)</li> <li>• Staff training/resources (n=3)</li> <li>• Administration support (n=2)</li> </ul>                                                                                    | <ul style="list-style-type: none"> <li>• <i>'Dedicated committed staff so it won't flounder...a few key people driving it'</i></li> <li>• <i>'Staffing such as releasing staff to deliver and continue to invest and develop the programme...allow staff to gain skills such as facilitation'</i></li> <li>• <i>'Adequate funding of the project is essential to its continued success'</i></li> </ul>                                                                                                                                                                                                                                                                                                                                                                                                                                                                                                                                                                              |

|                                          |                                                                                                                                                                       |                                                                                                                                                                                                                                                                                                                                                                                                                                                                                                                                                                                                                   |
|------------------------------------------|-----------------------------------------------------------------------------------------------------------------------------------------------------------------------|-------------------------------------------------------------------------------------------------------------------------------------------------------------------------------------------------------------------------------------------------------------------------------------------------------------------------------------------------------------------------------------------------------------------------------------------------------------------------------------------------------------------------------------------------------------------------------------------------------------------|
| Multidisciplinary team (MDT) involvement | <ul style="list-style-type: none"> <li>• MDT involvement to facilitate recruitment/referral (n=7)</li> <li>• MDT involvement in development/delivery (n=5)</li> </ul> | <ul style="list-style-type: none"> <li>• <i>'It needs to be inclusive of all relevant disciplines not just Public Health Nursing driven and led'</i></li> <li>• <i>'Joint delivery between PHN and dietitian works well - has strengthened the relationship between nursing and dietetics'</i></li> <li>• <i>'Could be alternated between PHN, peer leader and Dietitian, would need PHN buy in'</i></li> </ul>                                                                                                                                                                                                   |
| Participant characteristics              | <ul style="list-style-type: none"> <li>• Engaging participants from low SES (n=6)</li> <li>• Participant attendance (n=2)</li> </ul>                                  | <ul style="list-style-type: none"> <li>• <i>'How to engage those most in need of the information. Over the past 19 years it is middle-class well-informed parents that attend these workshops'</i></li> <li>• <i>'Access for lower socio-economic groups. They are under such social stress that they don't take up groups/workshops.'</i></li> <li>• <i>'The mums that attend is generally very interested in good nutrition and probably have read widely on the subject prior to attending. Unfortunately, it is difficult to get the mums who really need education on baby weaning to attend'</i></li> </ul> |

572

573
